# Supplementary material
Source: PubMed Central journal article supplement (PMC6096580)
Supplement: 330_2018_5395_MOESM1_ESM.pdf [file 330_2018_5395_MOESM1_ESM.pdf]

### All of the Radiomic Features from T1 and CE-T1 images

| Features on T1 images                              | Acute/sub-acute symptomatic | Asymptomatic | p-value |
|----------------------------------------------------|-----------------------------|--------------|---------|
| original_shape_Volume                              | 40.16±24.01                 | 27.41±12.63  | 0.005   |
| original_shape_SurfaceVolumeRatio                  | 1.93±0.30                   | 2.07±0.37    | 0.048   |
| original_shape_SurfaceArea                         | 71.83±29.23                 | 53.43±19.58  | 0.001   |
| original_shape_Sphericity                          | 0.78±0.07                   | 0.82±0.07    | 0.009   |
| original_shape_SphericalDisproportion              | 1.29±0.11                   | 1.23±0.12    | 0.016   |
| original_shape_MinorAxis                           | 4.22±1.21                   | 3.45±0.99    | 0.002   |
| original_shape_Maximum3DDiameter                   | 5.16±1.41                   | 4.25±0.95    | <0.001  |
| original_shape_Maximum2DDiameterSlice              | 5.16±1.41                   | 4.25±0.95    | <0.001  |
| original_shape_Maximum2DDiameterRow                | 4.02±1.28                   | 3.32±1.11    | 0.009   |
| original_shape_Maximum2DDiameterColumn             | 4.40±1.41                   | 3.60±0.91    | 0.004   |
| original_shape_MajorAxis                           | 5.73±1.42                   | 4.85±0.98    | 0.002   |
| original_shape_Elongation                          | 0.74±0.13                   | 0.71±0.13    | 0.297   |
| original_shape_Compactness2                        | 0.48±0.12                   | 0.56±0.14    | 0.005   |
| original_shape_Compactness1                        | 0.04±0.004                  | 0.04±0.005   | 0.009   |
| original_glszm_SmallAreaHighGrayLevelEmphasis      | 118.63±79.21                | 85.03±31.08  | 0.02    |
| original_glszm_GrayLevelVariance                   | 20.53±16.40                 | 18.50±7.10   | 0.494   |
| original_glszm_GrayLevelNonUniformityNormalized    | 0.09±0.01                   | 0.09±0.02    | 0.481   |
| original_glrlm_ShortRunLowGrayLevelEmphasis        | 0.05±0.04                   | 0.08±0.05    | 0.009   |
| original_glrlm_ShortRunHighGrayLevelEmphasis       | 131.60±83.59                | 91.78±31.15  | 0.06    |
| original_glrlm_ShortRunEmphasis                    | 0.95±0.02                   | 0.96±0.02    | 0.141   |
| original_glrlm_RunVariance                         | 0.07±0.04                   | 0.06±0.03    | 0.054   |
| original_glrlm_RunPercentage                       | 0.94±0.02                   | 0.95±0.02    | 0.062   |
| original_glrlm_RunLengthNonUniformityNormalized    | 0.88±0.04                   | 0.89±0.05    | 0.141   |
| original_glrlm_RunLengthNonUniformity              | 53.08±30.90                 | 37.03±16.46  | 0.006   |
| original_glrlm_RunEntropy                          | 3.90±0.38                   | 3.77±0.27    | 0.082   |
| original_glrlm_LowGrayLevelRunEmphasis             | 0.05±0.04                   | 0.08±0.06    | 0.013   |
| original_glrlm_LongRunLowGrayLevelEmphasis         | 0.06±0.05                   | 0.09±0.07    | 0.056   |
| original_glrlm_LongRunHighGrayLevelEmphasis        | 161.73±93.82                | 110.19±35.20 | 0.093   |
| original_glrlm_LongRunEmphasis                     | 1.21±0.10                   | 1.18±0.08    | 0.075   |
| original_glrlm_HighGrayLevelRunEmphasis            | 137.18±85.46                | 95.28±31.70  | 0.007   |
| original_glrlm_GrayLevelVariance                   | 19.15±16.15                 | 17.19±7.16   | 0.505   |
| original_glrlm_GrayLevelNonUniformityNormalized    | 0.09±0.01                   | 0.09±0.02    | 0.635   |
| original_glrlm_GrayLevelNonUniformity              | 5.11±2.61                   | 3.75±1.39    | 0.006   |
| original_gldm_SmallDependenceLowGrayLevelEmphasis  | 0.08±0.06                   | 0.06±0.04    | 0.002   |
| original_gldm_SmallDependenceHighGrayLevelEmphasis | 100.76±71.73                | 72.79±30.39  | 0.033   |
| original_gldm_SmallDependenceEmphasis              | 0.70±0.09                   | 0.73±0.11    | 0.103   |
| original_gldm_LowGrayLevelEmphasis                 | 0.05±0.04                   | 0.08±0.05    | 0.016   |
| original_gldm_LargeDependenceLowGrayLevelEmphasis  | 0.12±0.18                   | 0.14±0.15    | 0.531   |
| original_gldm_LargeDependenceHighGrayLevelEmphasis | 337.69±176.15               | 219.43±97.73 | 0.001   |
| original_gldm_LargeDependenceEmphasis              | 2.78±0.88                   | 2.49±0.71    | 0.106   |
| original_gldm_HighGrayLevelEmphasis                | 136.75±85.14                | 94.83±31.65  | 0.007   |
| original_gldm_GrayLevelVariance                    | 18.74±16.09                 | 16.79±7.20   | 0.505   |
| original_gldm_GrayLevelNonUniformityNormalized     | 0.095±0.027                 | 0.097±0.017  | 0.77    |

|                                                 |                       |                       |       |
|-------------------------------------------------|-----------------------|-----------------------|-------|
| original_gldm_GrayLevelNonUniformity            | 5.65±3.02             | 4.09±1.59             | 0.006 |
| original_gldm_DependenceVariance                | 0.49±0.31             | 0.41±0.20             | 0.176 |
| original_gldm_DependenceNonUniformityNormalized | 0.49±0.10             | 0.54±0.15             | 0.078 |
| original_gldm_DependenceNonUniformity           | 31.16±17.90           | 22.54±10.17           | 0.011 |
| original_gldm_DependenceEntropy                 | 4.40±0.43             | 4.16±0.36             | 0.006 |
| original_gldm_SumSquares                        | 18.57±16.79           | 16.19±6.65            | 0.429 |
| original_gldm_SumEntropy                        | 3.96±0.52             | 3.70±0.49             | 0.019 |
| original_gldm_SumAverage                        | 21.04±6.38            | 17.50±3.51            | 0.004 |
| original_gldm_MaximumProbability                | 0.05±0.01             | 0.05±0.02             | 0.358 |
| original_gldm_JointEnergy                       | 0.02±0.01             | 0.03±0.02             | 0.051 |
| original_gldm_JointAverage                      | 10.52±3.19            | 8.75±1.75             | 0.004 |
| original_gldm_InverseVariance                   | 0.24±0.05             | 0.22±0.05             | 0.062 |
| original_gldm_Imc2                              | 0.96±0.04             | 0.98±0.02             | 0.086 |
| original_gldm_Imc1                              | 0.41±0.11             | 0.48±0.14             | 0.009 |
| original_gldm_Idn                               | 0.84±0.02             | 0.83±0.03             | 0.006 |
| original_gldm_Idmn                              | 0.94±0.02             | 0.93±0.02             | 0.011 |
| original_gldm_Idm                               | 0.23±0.05             | 0.21±0.05             | 0.08  |
| original_gldm_Id                                | 0.32±0.04             | 0.31±0.05             | 0.114 |
| original_gldm_Homogeneity2                      | 0.23±0.04             | 0.21±0.05             | 0.08  |
| original_gldm_Homogeneity1                      | 0.23±0.05             | 0.31±0.05             | 0.123 |
| original_gldm_Entropy                           | 5.78±0.75             | 5.36±0.73             | 0.011 |
| original_gldm_Dissimilarity                     | 4.05±1.22             | 4.16±0.91             | 0.665 |
| original_gldm_DifferenceVariance                | 11.31±10.18           | 9.27±2.97             | 0.257 |
| original_gldm_DifferenceEntropy                 | 3.15±0.36             | 2.98±0.25             | 0.018 |
| original_gldm_DifferenceAverage                 | 4.05±1.22             | 4.16±0.91             | 0.665 |
| original_gldm_Correlation                       | 0.14±0.15             | 0.12±0.16             | 0.52  |
| original_gldm_Contrast                          | 29.42±22.88           | 27.75±11.62           | 0.691 |
| original_gldm_ClusterTendency                   | 44.87±46.32           | 36.99±18.37           | 0.344 |
| original_gldm_ClusterShade                      | 109.07±568.19         | 58.35±223.96          | 0.619 |
| original_gldm_ClusterProminence                 | 13439.79±36096.56     | 5184.10±7161.47       | 0.191 |
| original_gldm_Autocorrelation                   | 124.54±80.43          | 81.96±30.55           | 0.004 |
| original_firstorder_Variance                    | 11678.48±10137.24     | 10598.34±4828.87      | 0.56  |
| original_firstorder_Uniformity                  | 0.095±0.027           | 0.097±0.017           | 0.674 |
| original_firstorder_TotalEnergy                 | 6766448.88±7067367.51 | 4665427.94±4056723.69 | 0.114 |
| original_firstorder_StandardDeviation           | 101.77±36.66          | 100.71±21.70          | 0.877 |
| original_firstorder_Skewness                    | 0.01±0.50             | 0.28±0.52             | 0.016 |
| original_firstorder_RootMeanSquared             | 373.17±141.19         | 393.25±124.94         | 0.49  |
| original_firstorder_RobustMeanAbsoluteDeviation | 53.45±18.75           | 55.56±13.15           | 0.561 |
| original_firstorder_Range                       | 486.76±191.28         | 435.85±93.76          | 0.149 |
| original_firstorder_Minimum                     | 121.19±102.51         | 184.47±127.10         | 0.009 |
| original_firstorder_Median                      | 356.40±138.84         | 375.94±124.99         | 0.497 |
| original_firstorder_MeanAbsoluteDeviation       | 79.93±27.91           | 81.13±17.83           | 0.822 |
| original_firstorder_Mean                        | 358.07±138.87         | 378.85±127.08         | 0.472 |
| original_firstorder_Maximum                     | 607.95±234.24         | 620.32±155.90         | 0.783 |
| original_firstorder_Kurtosis                    | 3.22±0.81             | 2.94±1.18             | 0.18  |

|                                        |                       |                       |       |
|----------------------------------------|-----------------------|-----------------------|-------|
| original_firstorder_InterquartileRange | 127.42±45.70          | 136.07±42.91          | 0.367 |
| original_firstorder_Entropy            | 3.68±0.42             | 3.58±0.25             | 0.194 |
| original_firstorder_Energy             | 10826270.2±11307718.9 | 7490880.68±6470953.83 | 0.117 |
| original_firstorder_90Percentile       | 484.62±173.99         | 510.12±144.34         | 0.469 |
| original_firstorder_10Percentile       | 234.01±112.19         | 257.39±121.13         | 0.345 |
| general_info_VoxelNum                  | 64.26±38.42           | 44.12±19.98           | 0.005 |

---

| Features on CE-T1 images                           | Acute/sub-acute symptomatic | Asymptomatic  | p-value |
|----------------------------------------------------|-----------------------------|---------------|---------|
| original_shape_Volume                              | 39.55±21.29                 | 31.56±22.57   | 0.093   |
| original_shape_SurfaceVolumeRatio                  | 1.93±0.32                   | 2.08±0.56     | 0.087   |
| original_shape_SurfaceArea                         | 70.73±27.44                 | 56.55±28.12   | 0.021   |
| original_shape_Sphericity                          | 0.78±0.07                   | 0.82±0.07     | 0.011   |
| original_shape_SphericalDisproportion              | 1.29±0.11                   | 1.23±0.11     | 0.012   |
| original_shape_MinorAxis                           | 4.25±1.22                   | 3.56±1.34     | 0.012   |
| original_shape_Maximum3DDiameter                   | 5.05±1.25                   | 4.91±3.38     | 0.772   |
| original_shape_Maximum2DDiameterSlice              | 5.05±1.25                   | 4.38±1.38     | 0.019   |
| original_shape_Maximum2DDiameterRow                | 3.99±1.27                   | 3.50±1.51     | 0.096   |
| original_shape_Maximum2DDiameterColumn             | 4.40±1.26                   | 3.61±1.37     | 0.006   |
| original_shape_MajorAxis                           | 5.58±1.23                   | 5.25±2.43     | 0.382   |
| original_shape_Elongation                          | 0.76±0.14                   | 0.70±0.17     | 0.068   |
| original_shape_Compactness2                        | 0.49±0.13                   | 0.57±0.14     | 0.008   |
| original_shape_Compactness1                        | 0.036±0.004                 | 0.039±0.005   | 0.011   |
| original_glszm_SmallAreaHighGrayLevelEmphasis      | 249.20±256.14               | 150.77±95.24  | 0.036   |
| original_glszm_GrayLevelVariance                   | 57.79±70.30                 | 29.33±16.53   | 0.024   |
| original_glszm_GrayLevelNonUniformityNormalized    | 0.07±0.02                   | 0.08±0.03     | 0.003   |
| original_glrlm_ShortRunLowGrayLevelEmphasis        | 0.04±0.03                   | 0.05±0.03     | 0.079   |
| original_glrlm_ShortRunHighGrayLevelEmphasis       | 264.47±261.21               | 158.03±94.47  | 0.562   |
| original_glrlm_ShortRunEmphasis                    | 0.96±0.01                   | 0.97±0.02     | 0.248   |
| original_glrlm_RunVariance                         | 0.05±0.02                   | 0.05±0.03     | 0.4     |
| original_glrlm_RunPercentage                       | 0.95±0.02                   | 0.96±0.02     | 0.065   |
| original_glrlm_RunLengthNonUniformityNormalized    | 0.91±0.03                   | 0.92±0.04     | 0.223   |
| original_glrlm_RunLengthNonUniformity              | 54.71±29.03                 | 50.01±49.90   | 0.562   |
| original_glrlm_RunEntropy                          | 4.27±0.54                   | 3.91±0.45     | 0.001   |
| original_glrlm_LowGrayLevelRunEmphasis             | 0.05±0.03                   | 0.06±0.03     | 0.077   |
| original_glrlm_LongRunLowGrayLevelEmphasis         | 0.05±0.03                   | 0.06±0.03     | 0.065   |
| original_glrlm_LongRunHighGrayLevelEmphasis        | 303.53±280.44               | 181.15±99.72  | 0.017   |
| original_glrlm_LongRunEmphasis                     | 1.16±0.06                   | 1.15±0.08     | 0.335   |
| original_glrlm_HighGrayLevelRunEmphasis            | 271.87±264.80               | 162.39±95.28  | 0.024   |
| original_glrlm_GrayLevelVariance                   | 55.40±68.97                 | 27.96±16.10   | 0.027   |
| original_glrlm_GrayLevelNonUniformityNormalized    | 0.07±0.03                   | 0.09±0.02     | 0.004   |
| original_glrlm_GrayLevelNonUniformity              | 3.70±1.55                   | 4.13±3.16     | 0.374   |
| original_gldm_SmallDependenceLowGrayLevelEmphasis  | 0.04±0.02                   | 0.05±0.03     | 0.112   |
| original_gldm_SmallDependenceHighGrayLevelEmphasis | 219.85±237.21               | 130.48±87.23  | 0.04    |
| original_gldm_SmallDependenceEmphasis              | 0.76±0.07                   | 0.76±0.11     | 0.608   |
| original_gldm_LowGrayLevelEmphasis                 | 0.04±0.02                   | 0.05±0.03     | 0.084   |
| original_gldm_LargeDependenceLowGrayLevelEmphasis  | 0.07±0.04                   | 0.08±0.05     | 0.073   |
| original_gldm_LargeDependenceHighGrayLevelEmphasis | 526.95±410.30               | 344.18±267.85 | 0.023   |
| original_gldm_LargeDependenceEmphasis              | 2.31±0.56                   | 2.28±0.89     | 0.855   |
| original_gldm_HighGrayLevelEmphasis                | 270.22±263.11               | 161.15±94.07  | 0.024   |
| original_gldm_GrayLevelVariance                    | 54.60±68.51                 | 27.56±16.00   | 0.028   |
| original_gldm_GrayLevelNonUniformityNormalized     | 0.071±0.026                 | 0.087±0.025   | 0.006   |

|                                                 |                       |                       |       |
|-------------------------------------------------|-----------------------|-----------------------|-------|
| original_gldm_GrayLevelNonUniformity            | 3.98±1.72             | 4.44±3.44             | 0.39  |
| original_gldm_DependenceVariance                | 0.37±0.19             | 0.36±0.26             | 0.738 |
| original_gldm_DependenceNonUniformityNormalized | 0.55±0.10             | 0.58±0.16             | 0.332 |
| original_gldm_DependenceNonUniformity           | 34.72±18.96           | 28.07±18.20           | 0.102 |
| original_gldm_DependenceEntropy                 | 4.62±0.55             | 4.27±0.68             | 0.007 |
| original_gldm_SumSquares                        | 55.03±71.17           | 28.54±17.45           | 0.038 |
| original_gldm_SumEntropy                        | 4.35±0.68             | 3.77±0.87             | 0.001 |
| original_gldm_SumAverage                        | 28.07±11.91           | 22.84±6.28            | 0.021 |
| original_gldm_MaximumProbability                | 0.04±0.02             | 0.06±0.05             | 0.004 |
| original_gldm_JointEnergy                       | 0.02±0.01             | 0.04±0.05             | 0.006 |
| original_gldm_JointAverage                      | 14.03±5.96            | 11.42±3.14            | 0.021 |
| original_gldm_InverseVariance                   | 0.19±0.05             | 0.19±0.06             | 0.751 |
| original_gldm_Imc2                              | 0.99±0.01             | 0.98±0.16             | 0.016 |
| original_gldm_Imc1                              | 0.52±0.11             | 0.53±0.16             | 0.734 |
| original_gldm_Idn                               | 0.85±0.03             | 0.82±0.05             | 0.002 |
| original_gldm_Idmn                              | 0.95±0.02             | 0.92±0.05             | 0.001 |
| original_gldm_Idm                               | 0.18±0.04             | 0.18±0.05             | 0.756 |
| original_gldm_Id                                | 0.27±0.04             | 0.27±0.05             | 0.854 |
| original_gldm_Homogeneity2                      | 0.18±0.04             | 0.18±0.05             | 0.756 |
| original_gldm_Homogeneity1                      | 0.27±0.07             | 0.27±0.05             | 0.854 |
| original_gldm_Entropy                           | 6.01±0.84             | 5.43±1.21             | 0.007 |
| original_gldm_Dissimilarity                     | 5.72±2.20             | 5.39±1.79             | 0.455 |
| original_gldm_DifferenceVariance                | 26.18±29.94           | 17.17±16.07           | 0.112 |
| original_gldm_DifferenceEntropy                 | 3.15±0.36             | 2.98±0.25             | 0.003 |
| original_gldm_DifferenceAverage                 | 5.72±2.20             | 5.39±1.79             | 0.455 |
| original_gldm_Correlation                       | 0.28±0.19             | 0.13±0.25             | 0.001 |
| original_gldm_Contrast                          | 64.42±62.57           | 51.01±40.39           | 0.269 |
| original_gldm_ClusterTendency                   | 155.72±228.47         | 63.16±37.16           | 0.023 |
| original_gldm_ClusterShade                      | 1403.74±593.07        | 154.87±384.81         | 0.129 |
| original_gldm_ClusterProminence                 | 201614.94±616786.94   | 17293.63±19968.35     | 0.09  |
| original_gldm_Autocorrelation                   | 254.79±266.19         | 143.11±86.91          | 0.021 |
| original_firstorder_Variance                    | 34067.01±42704.46     | 17132.30±9885.43      | 0.027 |
| original_firstorder_Uniformity                  | 0.071±0.026           | 0.087±0.025           | 0.006 |
| original_firstorder_TotalEnergy                 | 12037569.8±14797063.1 | 6279463.22±4797646.78 | 0.032 |
| original_firstorder_StandardDeviation           | 164.06±33.66          | 126.62±33.66          | 0.017 |
| original_firstorder_Skewness                    | 0.36±0.48             | 0.32±0.68             | 0.689 |
| original_firstorder_RootMeanSquared             | 492.46±469.69         | 456.79±121.44         | 0.288 |
| original_firstorder_RobustMeanAbsoluteDeviation | 90.23±50.05           | 68.20±17.83           | 0.016 |
| original_firstorder_Range                       | 749.69±381.58         | 566.09±177.55         | 0.01  |
| original_firstorder_Minimum                     | 146.11±92.13          | 183.36±126.72         | 0.104 |
| original_firstorder_Median                      | 444.33±141.13         | 430.33±121.45         | 0.631 |
| original_firstorder_MeanAbsoluteDeviation       | 130.91±69.66          | 100.53±27.06          | 0.018 |
| original_firstorder_Mean                        | 462.22±153.36         | 437.28±122.75         | 0.422 |
| original_firstorder_Maximum                     | 895.51±386.99         | 749.45±183.47         | 0.043 |
| original_firstorder_Kurtosis                    | 3.10±0.86             | 3.42±2.64             | 0.389 |

|                                        |                       |                       |       |
|----------------------------------------|-----------------------|-----------------------|-------|
| original_firstorder_InterquartileRange | 215.73±125.02         | 164.16±53.33          | 0.026 |
| original_firstorder_Entropy            | 4.12±0.56             | 3.78±0.39             | 0.002 |
| original_firstorder_Energy             | 19260047.2±23675231.8 | 11358732.6±10602419.9 | 0.072 |
| original_firstorder_90Percentile       | 678.39±260.49         | 596.45±143.59         | 0.097 |
| original_firstorder_10Percentile       | 270.77±93.74          | 290.70±115.21         | 0.365 |
| general_info_VoxelNum                  | 63.27±34.07           | 58.39±58.37           | 0.608 |

---
